# Supplementary material for: Intraflagellar Transport Gene Expression Associated with Short Cilia in Smoking and COPD
Source: PLOS journal article supplement (doi:10.1371/journal.pone.0085453), 2014-01-20
Supplement: S6 (10.1371/journal.pone.0085453.s006) [file journal.pone.0085453.s006]

**Table S3. TaqMan Confirmation of Significantly Modified Intraflagellar Transport Genes<sup>1</sup>**

| <b>Gene symbol</b> | <b>Fold-change<sup>2</sup></b> | <b>p value<sup>3</sup></b> |
|--------------------|--------------------------------|----------------------------|
| KIF3A              | -1.63                          | 7.74x10 <sup>-2</sup>      |
| TRAF3IP1           | -1.48                          | 2.72 x10 <sup>-2</sup>     |
| IFT57              | -1.42                          | 3.57 x10 <sup>-2</sup>     |
| IFT172             | -1.65                          | 3.42 x10 <sup>-3</sup>     |
| CLUAP1             | -1.29                          | 1.59 x10 <sup>-1</sup>     |
| DYNC2H1            | -1.63                          | 1.52 x10 <sup>-2</sup>     |
| IFT43              | -1.38                          | 1.23 x10 <sup>-2</sup>     |

<sup>1</sup> Data obtained via TaqMan RT-PCR on LAE samples from the LAE microarray set of subjects.

<sup>2</sup> Fold-change represents the ratio of mean expression in healthy smokers to mean expression in healthy nonsmokers, with positive values representing genes up-regulated in smokers and negative values representing genes down-regulated in smokers.

<sup>3</sup> p values were calculated using Student's t test.
